# Supplementary material for: Patient reported outcomes following whole brain radiotherapy in patients with brain metastases in NSIA-LUTH Cancer Center
Source: BMC Cancer. 2023 Dec 14;23:1233. doi: 10.1186/s12885-023-11675-8 (PMC10722749; doi:10.1186/s12885-023-11675-8)
Supplement: Supplementary file 3 — Additional file 3. Raw and transformed patient reported scores. [file 12885_2023_11675_MOESM3_ESM.xlsx]

## Sheet: R0_BASELINE
PID	AGE	SEX	POR	REL	EDU	MS	ES	OCC	PT	SIRR	ECPS	PRIOR	RDG	RDF	TSD	COM	MEDS	PAL1	PAL2	PAL3	PAL4	PAL5	PAL6	PAL7	PAL8	PAL9	PAL10	PAL11	PAL12	PAL13	PAL14	PAL15	BN31	BN32	BN33	BN34	BN35	BN36	BN37	BN38	BN39	BN40	BN41	BN42	BN43	BN44	BN45	BN46	BN47
1	59	1	0	0	1	1	0	0	1	0	3	0	1	1	7	0	0	3	4	4	1	3	1	2	3	1	1	1	2	1	1	2	1	1	1	1	1	1	1	1	1	3	4	2	1	2	2	1	1
2	39	1	0	0	1	1	0	1	1	0	2	0	1	1	14	0	1	3	4	2	1	4	4	3	4	2	2	4	4	4	4	4	4	3	4	4	3	4	4	4	2	1	4	1	1	2	2	1	2
3	59	1	0	0	0	1	0	0	5	0	2	0	1	1	30	0	0	3	3	2	1	1	4	3	2	1	3	4	2	3	3	3	4	3	3	4	2	1	2	3	1	4	4	4	4	4	4	2	1
4	71	1	0	0	0	3	3	1	1	0	4	0	0	0	60	1	0	4	4	4	1	4	4	3	3	1	1	1	4	1	1	3	1	1	1	4	1	1	1	1	1	4	1	3	1	2	2	1	1
5	47	0	1	0	1	0	0	2	7	0	1	1	0	0	21	1	0	2	2	1	1	1	1	1	2	1	1	1	2	1	1	4	2	2	1	2	3	2	2	2	1	1	1	1	2	2	1	1	2
6	50	1	0	0	1	1	0	0	1	0	1	1	0	0	30	0	2	1	2	1	2	1	2	2	1	1	1	1	1	2	1	5	1	1	1	1	1	1	1	1	1	1	1	1	1	1	1	1	1
7	54	1	0	0	1	1	1	3	1	0	3	1	0	0	7	0	0	3	3	4	2	2	3	3	1	1	3	3	2	3	1	1	1	1	1	3	1	3	4	1	2	3	1	1	1	3	1	1	1
8	75	1	0	0	1	1	1	3	7	0	4	0	1	1	5	1	0	4	4	4	2	4	3	3	3	3	3	3	4	4	4	2	3	4	4	3	3	2	2	2	3	3	4	4	4	2	4	2	2
9	46	1	0	0	1	1	0	1	1	0	3	0	1	1	3	0	0	2	2	2	1	4	4	3	2	1	3	2	2	2	2	4	1	1	1	3	1	2	2	1	1	1	1	1	1	1	1	1	1
10	57	1	0	0	1	1	1	3	3	0	4	0	0	0	30	0	0	4	4	4	1	4	3	4	3	2	3	4	4	4	4	3	2	3	4	4	1	1	2	4	3	4	2	3	2	3	3	1	1
11	60	1	0	0	1	1	1	3	1	0	2	0	0	0	14	1	0	1	1	1	1	2	2	2	2	1	1	2	2	1	3	5	3	3	3	2	2	1	1	1	1	3	3	1	2	2	1	1	1
12	38	1	0	0	1	1	0	0	1	0	4	1	0	0	6	0	0	4	4	4	1	4	1	4	3	1	1	3	4	3	3	3	3	3	3	3	3	1	1	1	1	3	1	2	1	1	4	1	2
13	67	0	0	0	1	1	0	4	10	0	2	0	0	0	30	1	0	1	2	3	1	1	1	1	1	1	1	1	1	1	1	5	1	3	1	1	1	1	1	1	1	2	1	1	1	1	2	1	2
14	70	1	0	0	1	1	0	0	4	0	3	0	0	0	14	1	0	4	4	4	3	1	2	2	1	1	1	3	3	3	3	4	1	2	1	2	1	1	2	2	1	3	1	1	1	2	2	1	1
15	59	0	1	0	1	1	0	1	2	0	1	1	0	0	600	1	0	1	1	1	1	2	3	2	1	1	3	1	1	2	1	5	2	2	1	1	1	1	1	1	1	1	3	1	3	2	1	1	2
16	64	1	0	0	1	3	0	0	1	0	1	1	1	1	7	1	0	1	1	1	1	1	1	1	1	1	1	1	1	1	1	6	1	1	1	1	1	1	1	1	1	1	1	1	1	1	1	1	1
17	40	1	0	0	0	1	0	0	1	0	1	1	1	1	49	0	0	1	2	1	1	3	1	1	3	3	1	2	2	1	1	3	1	1	1	3	1	1	1	1	1	2	1	1	1	1	1	1	1
18	56	1	0	1	1	1	0	4	1	0	2	0	0	0	10	0	0	3	2	2	3	3	3	2	1	2	2	2	2	2	2	2	2	3	2	1	2	2	2	2	1	2	3	2	3	2	2	1	1
19	52	1	0	0	1	1	1	3	1	0	2	0	0	0	14	1	0	2	2	1	1	1	1	3	1	1	1	3	1	1	1	6	1	1	1	1	1	2	1	2	1	1	1	1	1	2	1	1	1
20	49	1	1	0	1	1	0	0	7	0	3	0	0	0	35	1	0	3	3	3	1	1	1	2	1	1	1	2	2	1	1	3	2	1	2	1	1	1	2	1	1	2	1	1	1	1	1	1	1
21	23	0	0	0	1	0	1	4	5	0	1	1	1	1	60	0	0	2	1	1	1	4	3	1	1	1	1	1	2	1	1	5	1	1	2	1	1	3	3	3	1	1	1	2	1	1	1	1	1
22	48	1	0	0	0	1	2	0	1	0	2	0	0	0	7	1	0	3	1	1	1	1	1	2	1	1	1	1	1	1	2	6	1	3	1	1	1	1	1	1	1	1	1	1	1	1	1	3	1
23	61	0	0	2	1	1	1	3	7	0	2	0	1	1	25	0	0	4	4	4	1	2	2	4	3	3	2	4	2	2	1	3	1	3	1	3	1	2	1	3	1	3	2	2	2	3	2	1	1
24	74	1	1	0	0	1	1	3	7	0	0	0	0	0	14	1	0	1	1	1	1	1	2	1	1	1	2	2	1	1	1	4	2	1	2	1	1	1	1	1	1	2	1	1	1	1	1	1	1
25	28	1	0	0	1	1	1	3	1	0	3	1	1	1	1	0	0	2	1	1	2	2	2	2	2	1	2	2	2	1	1	5	2	2	2	4	2	2	2	2	1	1	1	1	1	1	1	1	1
26	81	0	0	0	1	1	1	3	5	0	0	0	1	1	27	1	0	1	2	1	1	1	2	2	1	1	1	1	1	1	1	5	1	1	2	1	1	1	2	1	1	1	2	1	2	2	1	1	1
27	54	1	0	0	1	1	2	0	1	0	4	1	1	1	2	1	0	3	4	4	1	1	1	1	1	1	1	1	1	1	1	4	1	2	1	3	1	2	1	2	1	2	1	1	1	1	1	1	1
28	30	1	0	0	1	1	2	0	1	0	3	0	0	0	81	0	0	4	4	4	1	2	3	2	3	1	1	2	3	2	1	3	1	3	2	4	1	2	4	4	1	3	1	1	1	1	2	2	1
29	47	1	0	0	0	1	0	0	1	0	2	0	1	1	5	1	0	1	1	1	1	1	2	2	2	1	1	2	2	1	1	4	1	2	1	3	2	1	1	1	1	1	1	1	1	1	2	1	1
30	38	1	0	0	1	1	1	3	1	0	2	1	1	1	22	1	2	3	3	3	2	2	2	2	2	2	1	2	3	2	1	3	3	2	2	2	1	1	1	1	2	1	1	1	1	2	2		1
31	50	1	0	0	1	1	2	0	1	0	2	0	1	1	21	1	0	3	3	3	1	2	2	2	2	1	1	2	3	1	1	3	1	2	2	2	1	1	1	1	1	2	1	1	1	1	2	1	1
32	57	1	0	0	1	2	0	2	1	0	0	1	1	1	7	0	0	3	3	3	1	3	2	2	2	1	1	2	3	1	1	3	2	3	2	3	1	1	1	1	1	2	1	1	1	1	2	1	1
33	63	1	0	0	1	1	0	0	1	0	0	0	1	1	14	1	0	2	2	1	1	2	2	2	1	1	1	2	2	1	1	5	2	2	1	2	2	1	1	1	2	2	1	1	1	1	2	1	1
34	33	1	0	0	1	0	1	4	8	0	1	0	1	1	30	0	0	2	2	2	1	3	2	2	2	2	2	2	3	2	1	3	2	2	2	3	1	1	1	1	2	1	1	1	1	1	2	1	1
35	58	1	0	0	1	1	1	3	1	0	3	1	0	0	44	1	1	4	3	4	1	3	2	3	1	1	1	2	3	2	1	3	1	2	2	4	2	1	1	1	2	1	1	1	2	2	1	1	1
36	58	1	0	0	0	1	1	3	1	0	3	0	1	1	14	1	0	3	3	3	1	2	2	2	2	1	1	2	2	1	1	4	2	2	1	3	1	2	1	2	1	2	1	1	1	1	2	1	1
37	44	1	0	0	1	1	0	2	1	0	2	1	1	0	9	0	0	2	2	2	1	2	2	2	2	1	1	2	2	1	1	4	2	2	1	1	1	1	1	1	1	1	2	1	1	1	2	1	1
38	65	1	0	1	1	3	1	3	1	0	2	1	0	0	14	1	0	2	1	2	1	1	3	2	1	1	1	1	1	1	3	6	1	1	1	2	1	2	1	1	1	2	1	1	1	1	1	1	1
39	58	1	0	0	0	1	0	0	1	0	3	0	0	0	7	1	0	4	3	3	1	3	3	3	1	1	3	3	3	3	3	3	2	2	2	1	1	1	1	1	1	3	1	1	1	1	3	1	1
40	52	1	0	0	1	1	0	1	1	0	0	0	0	0	24	0	0	1	1	1	1	1	1	1	1	1	1	1	1	1	1	7	1	1	1	2	1	1	1	1	1	1	1	1	1	1	1	1	1
41	46	0	0	1	1	1	0	4	6	0	4	0	1	1	69	1	0	1	1	1	2	2	1	1	2	2	3	3	3	2	2	3	1	1	2	3	3	1	2	1	3	1	2	2	2	2	1	1	1
42	51	1	0	0	1	1	0	0	1	0	4	0	0	0	6	1	0	4	4	4	1	3	2	3	3	1	3	3	1	1	1	4	3	3	3	3	3	1	1	1	1	2	1	1	1	1	1	1	1
43	59	0	1	0	1	1	2	0	0	0	3	0	0	0	65	0	0	1	1	2	2	2	1	2	2	1	1	2	1	2	1	4	1	2	2	3	1	2	2	2	1	1	3	2	2	1	3	1	1
44	61	1	0	1	1	1	0	2	7	0	2	0	0	0	8	1	0	4	4	4	3	3	4	4	4	4	4	4	4	4	2	4	2	4	4	4	4	4	4	2	4	1	4	4	4	4	4	1	2
45	67	0	0	0	1	1	0	4	9	0	3	0	1	1	21	1	0	1	3	3	1	3	2	2	1	1	1	2	2	1	2	4	1	3	3	3	1	1	2	2	1	1	1	1	1	1	1	1	1
46	49	1	0	0	1	1	0	4	1	0	3	0	1	1	21	1	0	3	3	3	1	3	3	2	2	1	1	2	3	2	2	4	3	3	3	3	2	2	1	2	2	1	1	2	2	2	2	1	1
47	45	1	0	0	1	1	0	0	1	0	4	1	1	1	30	1	0	4	3	3	1	3	1	1	1	3	1	2	2	1	2	4	1	4	4	4	2	3	1	1	3	1	2	2	1	1	2	1	1
48	37	1	0	0	1	1	0	1	1	0	4	1	1	1	171	0	0	3	3	3	1	1	1	2	1	1	1	2	2	1	1	5		2	4	3	3	2	1	1	1	4	1	1	1	1	1	1	1
49	47	1	0	0	1	0	0	0	1	0	0	0	1	1	7	1	0	1	1	1	2	2	2	2	2	2	2	1	1	1	1	6	1	2	2	2	2	3	3	2	1	2	1	1	1	2	1	2	1
50	55	1	0	0	0	3	0	0	1	0	4	1	0	0	9	1	0	4	4	4	3	3	3	3	3	2	1	2	4	2	1	2	3	3	2	3	1	1	1	1	2	3	2	2	1	1	2	1	1
51	51	1	0	0	1	1	0	0	1	0	0	1	0	0	21	1	0	1	1	1	1	3	1	1	1	1	1	1	1	1	1	5	2	1	1	2	1	2	2	1	1	2	1	1	1	1	1	1	1
52	34	1	0	0	1	0	0	0	7	0	4	0	1	1	37	0	0	4	4	4	2	3	2	3	3	2	2	3	3	2	1	3	3	3	4	3	2	1	2	2	2	3	2	1	2	2	2	1	1
Raw Score																		2.51923	2.51923	2.44231	1.32692	2.25	2.09615	2.17308	1.84615	1.38462	1.55769	2.07692	2.19231	1.69231	1.55769	3.92308	1.69231	2.11538	1.96154	2.44231	1.53846	1.55769	1.59615	1.55769	1.38462	1.92308	1.59615	1.44231	1.44231	1.55769	1.73077	1.09615	1.13462
Linear Fn Scale																		49.359	49.359	51.9231	89.1026	58.3333	63.4615	60.8974	71.7949	87.1795	81.4103	64.1026	60.2564	76.9231	81.4103	51.2821	76.9231	62.8205	67.9487	51.9231	82.0513	81.4103	80.1282	81.4103	87.1795	69.2308	80.1282	85.2564	85.2564	81.4103	75.641	96.7949	95.5128
Linear Symp Scale																		50.641	50.641	48.0769	10.8974	41.6667	36.5385	39.1026	28.2051	12.8205	18.5897	35.8974	39.7436	23.0769	18.5897	48.7179	23.0769	37.1795	32.0513	48.0769	17.9487	18.5897	19.8718	18.5897	12.8205	30.7692	19.8718	14.7436	14.7436	18.5897	24.359	3.20513	4.48718
Linear QoL																		50.641	50.641	48.0769	10.8974	41.6667	36.5385	39.1026	28.2051	12.8205	18.5897	35.8974	39.7436	23.0769	18.5897	48.7179	23.0769	37.1795	32.0513	48.0769	17.9487	18.5897	19.8718	18.5897	12.8205	30.7692	19.8718	14.7436	14.7436	18.5897	24.359	3.20513	4.48718
Age (Mean)	52.6154
Age (STD)	12.2759
Male		9
Female		43
Urban			47
Rural			5
Secondary					9
Post-secondary					43
Single						5
Married						42
Divorved						1
Widow						4
Employed							31
Unemployed							15
Self-employed							5
Retired							1
Anaplastic Thyroid									1
Breast									34
Carcinoid Tumor									1
Cup									1
GI									1
Head/Neck									3
LT Thigh									1
Lungs									7
Parotid									1
Prostate									1
Renal									1
KPS 90-100											7
KPS 70-80											7
KPS 50-60											14
KPS 30-40											13
KPS 10-20											11
KPS 0											0
Pior RT												19
No prior RH												33
Co-morb Abs																21
Co-morb Prsnt																31
Steroids																	48
Analgesic																	2
Analgesic/steroids																	2
[truncated: 3 more columns]

## Sheet: R1_7DAYS
PID	AGE	SEX	POR	REL	EDU	MS	ES	OCC	PT	SIRR	ECPS	PRIOR	RDG	RDF	TSD	COM	MEDS	PAL1	PAL2	PAL3	PAL4	PAL5	PAL6	PAL7	PAL8	PAL9	PAL10	PAL11	PAL12	PAL13	PAL14	PAL15	BN31	BN32	BN33	BN34	BN35	BN36	BN37	BN38	BN39	BN40	BN41	BN42	BN43	BN44	BN45	BN46	BN47
1	59	1	0	0	1	1	0	0	1	0	3	0	1	1	7	0	0
2	39	1	0	0	1	1	0	1	1	0	2	0	1	1	14	0	1	2	3	1	2	3	4	3	2	1	4	4	4	1	3	4	3	1	1	2	2	2	3	3	3	1	2	2	1	1	3	1	1
3	59	1	0	0	0	1	0	0	5	0	2	0	1	1	30	0	0	2	1	1	1	4	1	3	1	3	2	3	4	3	1	4	2	2	2	3	1	3	2	1	2	4	1	1	2	1	3	4	1
4	71	1	0	0	0	3	3	1	1	0	4	0	0	0	60	1	0	2	1	3	1	2	4	2	1	1	1	1	3	2	2	5	2	1	2	3	1	1	1	1	1	3	1	1	1	2	2	1	1
5	47	0	1	0	1	0	0	2	7	0	1	1	0	0	21	1	0	2	2	1	1	1	1	2	1	1	1	2	1	1	1	5	2	2	1	2	1	2	2	2	2	1	1	1	1	2	2	1	1
6	50	1	0	0	1	1	0	0	1	0	1	1	0	0	30	0	2	1	1	1	1	2	1	1	1	1	1	1	1	1	1	5	1	1	1	1	1	1	1	1	1	1	1	1	1	1	1	1	1
7	54	1	0	0	1	1	1	3	1	0	3	1	0	0	7	0	0	3	3	3	2	2	2	2	1	1	3	2	2	2	2	3	1	1	1	2	1	3	3	3	2	3	1	1	1	3	1	1	1
8	75	1	0	0	1	1	1	3	7	0	4	0	1	1	5	1	0	4	4	4	1	4	3	3	3	3	3	3	4	4	4	2	3	4	4	2	2	2	2	2	2	2	3	3	3	2	4	2	2
9	46	1	0	0	1	1	0	1	1	0	3	0	1	1	3	0	0	1	1	2	1	3	3	2	1	1	2	2	2	2	2	6	1	1	1	2	1	2	2	1	1	1	1	1	1	1	1	1	1
10	57	1	0	0	1	1	1	3	3	0	4	0	0	0	30	0	0	1	1	2	1	2	2	2	1	1	2	2	1	1	1	5	1	1	2	1	1	2	2	2	2	2	1	1	1	2	2	1	1
11	60	1	0	0	1	1	1	3	1	0	2	0	0	0	14	1	0	2	2	2	1	1	1	1	1	1	1	1	2	1	1	5	1	1	1	2	1	2	2	2	1	1	1	1	1	1	1	1	1
12	38	1	0	0	1	1	0	0	1	0	4	1	0	0	6	0	0	4	4	4	1	4	1	4	3	1	1	3	3	3	3	3	3	3	3	3	3	1	1	1	1	3	1	2	1	1	4	1	1
13	67	0	0	0	1	1	0	4	10	0	2	0	0	0	30	1	0	1	2	2	1	1	1	1	1	1	1	1	1	1	1	5	1	1	1	1	1	1	1	1	1	2	1	1	1	1	2	1	1
14	70	1	0	0	1	1	0	0	4	0	3	0	0	0	14	1	0	3	3	3	1	3	2	2	1	1	1	2	2	2	2	5	1	2	1	2	1	2	2	2	1	2	1	1	1	2	2	1	1
15	59	0	1	0	1	1	0	1	2	0	1	1	0	0	600	1	0	1	1	1	1	2	2	2	1	1	2	1	1	1	1	4	1	1	1	1	1	1	1	1	1	1	2	1	2	2	1	1	1
16	64	1	0	0	1	3	0	0	1	0	1	1	1	1	7	1	0	1	1	1	1	1	1	1	1	1	1	1	1	1	1	6	1	1	1	1	1	1	1	1	1	1	1	1	1	1	1	1	1
17	40	1	0	0	0	1	0	0	1	0	1	1	1	1	49	0	0	1	1	1	1	2	1	2	1	1	1	1	2	1	1	4	1	1	1	2	1	1	1	1	1	1	1	1	1	1	1	1	1
18	56	1	0	1	1	1	0	4	1	0	2	0	0	0	10	0	0	3	3	2	2	3	3	3	2	1	2	3	3	2	2	2	2	2	2	1	2	2	2	2	1	3	3	3	2	2	3	1	1
19	52	1	0	0	1	1	1	3	1	0	2	0	0	0	14	1	0	1	1	1	1	1	1	1	1	1	1	2	1	1	1	4	1	1	1	1	1	1	1	1	1	1	1	1	1	1	1	1	1
20	49	1	1	0	1	1	0	0	7	0	3	0	0	0	35	1	0	3	3	3	1	2	3	1	1	1	3	2	1	2	2	3	2	2	2	3	1	1	2	1	1	1	1	2	2	2	4	1	1
21	23	0	0	0	1	0	1	4	5	0	1	1	1	1	60	0	0	1	1	1	2	1	3	1	3	1	3	2	1	1	1	6	1	1	1	3	1	2	1	1	1	1	1	1	1	2	1	1	1
22	48	1	0	0	0	1	2	0	1	0	2	0	0	0	7	1	0	3	1	1	1	1	1	3	2	1	2	1	1	1	1	4	1	3	1	1	1	1	1	1	1	1	1	1	1	1	1	1	1
23	61	0	0	2	1	1	1	3	7	0	2	0	1	1	25	0	0	4	4	4	1	3	2	3	3	3	2	4	2	2	1	3	1	3	2	3	2	1	2	1	1	3	2	2	3	1	1	1	3
24	74	1	1	0	0	1	1	3	7	0	0	0	0	0	14	1	0
25	28	1	0	0	1	1	1	3	1	0	3	1	1	1	1	0	0	3	2	2	2	3	2	3	2	2	1	2	2	1	1	5	2	2	2	4	2	2	2	2	1	2	1	1	1	1	1	1	1
26	81	0	0	0	1	1	1	3	5	0	0	0	1	1	27	1	0	1	2	1	1	1	2	2	1	1	1	1	1	1	1	5	1	1	2	1	1	1	2	1	1	1	2	1	2	2	1	1	1
27	54	1	0	0	1	1	2	0	1	0	4	1	1	1	2	1	0	3	3	3	1	1	1	1	1	1	1	1	1	1	1	5	1	2	1	2	1	2	1	2	1	2	1	1	1	1	1	1	1
28	30	1	0	0	1	1	2	0	1	0	3	0	0	0	81	0	0	4	4	4	1	1	1	1	1	1	1	1	2	2	1	5	1	2	2	1	1	3	3	3	1	2	1	1	1	1	2	1	1
29	47	1	0	0	0	1	0	0	1	0	2	0	1	1	5	1	0	1	1	1	1	1	1	1	1	1	1	2	1	1	1	5	1	2	1	1	1	1	1	1	1	1	1	1	1	1	1	1	1
30	38	1	0	0	1	1	1	3	1	0	2	1	1	1	22	1	2	2	2	2	1	2	1	1	2	1	1	2	2	1	1	5	2	2	2	1	1	1	1	1	1	1	1	1	1	1	2	1	1
31	50	1	0	0	1	1	2	0	1	0	2	0	1	1	21	1	0	3	3	3	1	2	1	2	1	1	1	1	2	1	1	4	1	2	2	1	1	1	1	1	1	2	1	1	1	1	1	1	1
32	57	1	0	0	1	2	0	2	1	0	0	1	1	1	7	0	0	3	3	3	1	2	2	1	2	1	1	2	2	1	1	4	2	2	2	1	1	1	1	1	1	2	1	1	1	1	2	1	1
33	63	1	0	0	1	1	0	0	1	0	0	0	1	1	14	1	0	2	2	1	1	2	2	3	2	2	1	3	2	2	1	4	2	2	1	1	1	1	1	1	1	2	1	1	1	1	1	1	1
34	33	1	0	0	1	0	1	4	8	0	1	0	1	1	30	0	0	2	2	2	1	2	2	1	2	1	1	1	2	1	1	4	2	2	2	1	1	1	1	1	1	1	1	1	1	1	2	1	1
35	58	1	0	0	1	1	1	3	1	0	3	1	0	0	44	1	1	3	3	3	1	2	2	2	1	1	1	2	2	2	1	3	1	2	2	2	2	1	1	1	2	1	1	1	2	2	1	1	1
36	58	1	0	0	0	1	1	3	1	0	3	0	1	1	14	1	0	2	2	2	1	2	2	1	2	1	1	1	2	1	1	4	2	2	1	1	1	1	2	1	1	2	1	1	1	1	2	1	1
37	44	1	0	0	1	1	0	2	1	0	2	1	1	0	9	0	0	1	1	1	1	2	2	2	2	1	1	1	2	1	1	5	2	2	1	1	1	1	1	1	1	1	1	1	1	1	1	2	1
38	65	1	0	1	1	3	1	3	1	0	2	1	0	0	14	1	0	2	1	2	1	1	2	2	1	1	1	1	1	1	2	6	1	1	1	1	1	2	1	1	1	2	1	1	1	1	1	1	1
39	58	1	0	0	0	1	0	0	1	0	3	0	0	0	7	1	0	4	3	3	1	3	3	3	2	2	3	3	3	3	3	3	2	2	2	1	1	2	1	1	2	3	1	1	1	3	1	1	3
40	52	1	0	0	1	1	0	1	1	0	0	0	0	0	24	0	0	1	1	1	1	1	1	1	1	1	1	1	1	1	1	7	1	1	1	1	1	1	1	1	1	1	1	1	1	1	1	1	1
41	46	0	0	1	1	1	0	4	6	0	4	0	1	1	69	1	0	1	3	3	2	2	2	3	1	1	2	3	3	3	1	3	1	1	1	2	2	2	2	1	1	2	3	3	2	3	3	3	2
42	51	1	0	0	1	1	0	0	1	0	4	0	0	0	6	1	0	4	4	4	1	3	2	3	1	2	3	2	2	1	1	4	3	3	3	3	3	1	1	1	1	2	1	1	1	2	1	1	1
43	59	0	1	0	1	1	2	0	0	0	3	0	0	0	65	0	0	1	2	3	2	2	2	1	1	3	4	4	4	3	2	4	1	2	3	1	2	2	1	1	2	2	3	2	1	2	3	2	1
44	61	1	0	1	1	1	0	2	7	0	2	0	0	0	8	1	0	4	4	4	1	3	3	3	2	1	1	3	3	2	1	4	2	4	4	2	3	3	2	2	1	3	3	2	2	1	2	1	1
45	67	0	0	0	1	1	0	4	9	0	3	0	1	1	21	1	0	1	2	3	1	3	2	2	2	1	1	2	2	2	1	4	1	3	3	1	1	1	2	2	1	1	1	1	1		1	1	1
46	49	1	0	0	1	1	0	4	1	0	3	0	1	1	21	1	0	3	3	3	1	2	2	2	2	1	1	2	2	2	2	4	3	3	3	2	2	2	1	2	1	1	1	1	1	2	2	1	1
47	45	1	0	0	1	1	0	0	1	0	4	1	1	1	30	1	0	4	3	4	1	3	2	2	2	1	1	2	2	1	1	4	1	4	4	2	2	3	1	1	2	2	2	2	2	1	2	1	1
48	37	1	0	0	1	1	0	1	1	0	4	1	1	1	171	0	0	3	3	2	1	2	1	3	1	1	1	2	3	1	1	5	2	3	3	1	1	1	1	1	1	3	1	1	1	1	2	1	1
49	47	1	0	0	1	0	0	0	1	0	0	0	1	1	7	1	0	1	1	1	2	2	2	2	2	1	1	1	1	1	1	6	1	2	2	2	2	2	2	2	1	2	1	1	1	2	1	1	1
50	55	1	0	0	0	3	0	0	1	0	4	1	0	0	9	1	0
51	51	1	0	0	1	1	0	0	1	0	0	1	0	0	21	1	0	1	1	1	1	2	1	1	1	1	1	1	1	1	1	5	2	1	1	1	1	2	2	1	1	2	1	1	1	1	1	1	1
52	34	1	0	0	1	0	0	0	7	0	4	0	1	1	37	0	0	4	4	4	1	2	2	2	2	2	2	3	2	1	1	4	2	3	3	1	2	1	1	2	1	2	2	1	2	2	2	1	1
Raw Score																		2.2449	2.22449	2.2449	1.16327	2.08163	1.85714	1.95918	1.5102	1.26531	1.55102	1.91837	1.95918	1.53061	1.36735	4.36735	1.55102	1.91837	1.79592	1.65306	1.36735	1.57143	1.4898	1.38776	1.22449	1.77551	1.32653	1.26531	1.28571	1.42857	1.69388	1.16327	1.12245
Linear Fn Scale																		58.5034	59.1837	58.5034	94.5578	63.9456	71.4286	68.0272	82.9932	91.1565	81.6327	69.3878	68.0272	82.3129	87.7551	43.8776	81.6327	69.3878	73.4694	78.2313	87.7551	80.9524	83.6735	87.0748	92.517	74.1497	89.1156	91.1565	90.4762	85.7143	76.8707	94.5578	95.9184
Linear Symp Scale																		41.4966	40.8163	41.4966	5.44218	36.0544	28.5714	31.9728	17.0068	8.84354	18.3673	30.6122	31.9728	17.6871	12.2449	56.1224	18.3673	30.6122	26.5306	21.7687	12.2449	19.0476	16.3265	12.9252	7.48299	25.8503	10.8844	8.84354	9.52381	14.2857	23.1293	5.44218	4.08163
Linear QoL																		41.4966	40.8163	41.4966	5.44218	36.0544	28.5714	31.9728	17.0068	8.84354	18.3673	30.6122	31.9728	17.6871	12.2449	56.1224	18.3673	30.6122	26.5306	21.7687	12.2449	19.0476	16.3265	12.9252	7.48299	25.8503	10.8844	8.84354	9.52381	14.2857	23.1293	5.44218	4.08163
[truncated: 3 more columns]

## Sheet: R2_30DAYS
PID	AGE	SEX	POR	REL	EDU	MS	ES	OCC	PT	SIRR	ECPS	PRIOR	RDG	RDF	TSD	COM	MEDS	PAL1	PAL2	PAL3	PAL4	PAL5	PAL6	PAL7	PAL8	PAL9	PAL10	PAL11	PAL12	PAL13	PAL14	PAL15	BN31	BN32	BN33	BN34	BN35	BN36	BN37	BN38	BN39	BN40	BN41	BN42	BN43	BN44	BN45	BN46	BN47
1	59	1	0	0	1	1	0	0	1	0	3	0	1	1	7	0	0
2	39	1	0	0	1	1	0	1	1	0	2	0	1	1	14	0	1	2	3	1	2	3	4	4	4	2	4	4	4	3	3	3	3	3	3	3	3	3	3	3	3	3	2	2	2	1	1	1	1
3	59	1	0	0	0	1	0	0	5	0	2	0	1	1	30	0	0	2	2	1	1	3	2	2	1	1	2	2	3	2	1	4	2	2	2	2	2	2	2	2	1	3	1	1	2	1	3	1	1
4	71	1	0	0	0	3	3	1	1	0	4	0	0	0	60	1	0	2	1	3	1	2	3	2	1	1	1	2	3	2	2	5	2	1	2	2	1	1	1	1	1	3	1	2	1	2	2	1	1
5	47	0	1	0	1	0	0	2	7	0	1	1	0	0	21	1	0	3	3	2	1	2	1	2	1	1	1	2	1	2	1	5	2	2	1	1	1	1	1	1	1	2	1	2	2	2	3	1	1
6	50	1	0	0	1	1	0	0	1	0	1	1	0	0	30	0	2	1	1	1	2	2	1	2	1	1	1	2	1	1	1	5	2	1	2	1	1	1	1	1	2	1	1	1	1	1	1	1	1
7	54	1	0	0	1	1	1	3	1	0	3	1	0	0	7	0	0	3	3	3	2	2	2	2	1	1	2	2	2	2	2	3	1	1	1	2	1	3	3	3	2	3	1	1	1	3	1	1	1
8	75	1	0	0	1	1	1	3	7	0	4	0	1	1	5	1	0	3	3	3	1	3	3	3	3	3	3	3	3	3	3	3	2	2	2	1	1	2	2	2	2	2	3	3	3	2	3	3	1
9	46	1	0	0	1	1	0	1	1	0	3	0	1	1	3	0	0	1	1	2	1	2	2	2	1	1	1	2	1	1	1	6	1	1	1	1	1	2	2	2	1	1	1	1	1	1	1	1	1
10	57	1	0	0	1	1	1	3	3	0	4	0	0	0	30	0	0	1	1	2	1	1	2	2	1	1	1	2	1	1	1	4	1	1	1	1	1	2	2	2	2	2	1	1	1	1	1	1	1
11	60	1	0	0	1	1	1	3	1	0	2	0	0	0	14	1	0	2	1	2	1	1	1	1	1	1	1	2	1	1	1	5	1	1	1	2	1	2	2	2	1	2	1	1	1	1	1	1	1
12	38	1	0	0	1	1	0	0	1	0	4	1	0	0	6	0	0	4	4	4	1	3	3	3	1	1	1	3	3	2	2	4	2	2	2	2	2	1	1	1	1	3	1	1	1	1	3	1	1
13	67	0	0	0	1	1	0	4	10	0	2	0	0	0	30	1	0	1	1	1	1	1	1	1	1	1	1	1	1	1	1	6	1	1	1	1	1	1	1	1	1	2	1	1	1	1	1	1	1
14	70	1	0	0	1	1	0	0	4	0	3	0	0	0	14	1	0	3	3	2	1	2	2	2	2	2	2	2	2	2	2	3	1	1	1	2	2	2	2	2	2	2	1	1	1	2	3	1	1
15	59	0	1	0	1	1	0	1	2	0	1	1	0	0	600	1	0	1	1	1	1	2	2	1	1	1	1	1	1	1	1	5	1	1	1	1	1	1	1	1	1	1	2	1	1	1	1	1	1
16	64	1	0	0	1	3	0	0	1	0	1	1	1	1	7	1	0	1	1	1	1	1	1	1	1	1	1	1	1	1	1	6	1	1	1	1	1	1	1	1	1	1	1	1	1	1	1	1	1
17	40	1	0	0	0	1	0	0	1	0	1	1	1	1	49	0	0	1	2	1	1	2	1	1	2	2	1	1	2	1	1	5	1	1	1	2	1	1	1	1	1	2	1	1	1	1	1	1	1
18	56	1	0	1	1	1	0	4	1	0	2	0	0	0	10	0	0	3	3	3	1	2	2	2	2	2	1	2	2	22	2	3	1	1	1	1	2	2	2	2	1	2	2	2	2	2	3	1	1
19	52	1	0	0	1	1	1	3	1	0	2	0	0	0	14	1	0	1	2	1	1	1	1	1	1	1	1	2	1	1	1	5	1	1	1	1	1	1	1	1	1	1	1	1	1	1	1	1	1
20	49	1	1	0	1	1	0	0	7	0	3	0	0	0	35	1	0	3	3	2	1	2	2	1	1	1	2	2	2	1	1	4	1	2	1	2	1	1	2	1	1	1	1	2	2	2	2	1	1
21	23	0	0	0	1	0	1	4	5	0	1	1	1	1	60	0	0	1	1	1	1	1	2	1	1	1	1	1	1	1	1	6	1	1	1	1	1	1	1	1	1	1	1	1	1	2	1	1	1
22	48	1	0	0	0	1	2	0	1	0	2	0	0	0	7	1	0	2	1	1	1	1	1	2	1	1	1	2	1	1	1	6	1	2	1	1	1	1	1	1	1	1	1	1	1	1	1	1	1
23	61	0	0	2	1	1	1	3	7	0	2	0	1	1	25	0	0	2	1	3	2	1	4	3	3	2	1	2	3	4	4	4	1	2	1	1	1	1	2	3	3	2	2	2	2	3	3	3	2
24	74	1	1	0	0	1	1	3	7	0	0	0	0	0	14	1	0
25	28	1	0	0	1	1	1	3	1	0	3	1	1	1	1	0	0	3	3	3	2	3	3	3	2	1	1	2	3	2	2	3	2	4	2	1	1	2	2	2	1	1	1	1	1	1	2	1	1
26	81	0	0	0	1	1	1	3	5	0	0	0	1	1	27	1	0	1	2	1	1	1	2	2	1	1	1	1	1	1	1	5	1	1	2	1	1	1	2	1	1	1	1	1	1	1	1	1	1
27	54	1	0	0	1	1	2	0	1	0	4	1	1	1	2	1	0	3	3	3	1	1	1	1	1	1	1	1	1	1	1	4	1	2	1	2	1	2	1	2	1	2	1	1	1	1	1	1	1
28	30	1	0	0	1	1	2	0	1	0	3	0	0	0	81	0	0	4	4	4	1	1	1	1	1	1	1	1	1	1	1	5	1	2	2	1	1	2	3	3	1		2	1	1	1	2	1	1
29	47	1	0	0	0	1	0	0	1	0	2	0	1	1	5	1	0	1	1	1	1	1	2	1	2	1	1	1	2	1	1	5	1	2	1	1	1	1	1	1	1	1	1	1	1	1	1	1	1
30	38	1	0	0	1	1	1	3	1	0	2	1	1	1	22	1	2	2	2	2	1	2	2	2	2	2	1	2	2	1	1	5	2	2	2	1	1	1	1	1	1	1	1	1	1	1	1	1	1
31	50	1	0	0	1	1	2	0	1	0	2	0	1	1	21	1	0	3	3	3	1	2	1	1	1	1	1	1	2	1	1	4	1	2	2	1	1	1	1	1	1	2	1	1	1	1	1	1	1
32	57	1	0	0	1	2	0	2	1	0	0	1	1	1	7	0	0	3	3	3	1	2	2	1	2	1	1	2	2	1	1	5	2	2	1	1	1	1	1	1	1	2	1	1	1	1	2	1	1
33	63	1	0	0	1	1	0	0	1	0	0	0	1	1	14	1	0	1	1	1	1	2	2	2	1	1	1	2	1	1	1	5	2	2	1	1	1	1	1	1	1	1	1	1	1	1	1	1	1
34	33	1	0	0	1	0	1	4	8	0	1	0	1	1	30	0	0	2	2	2	1	2	2	1	2	1	1	1	2	1	1	4	1	2	2	2	3	3	1	1	1	3	2	2	2	3	2	2	3
35	58	1	0	0	1	1	1	3	1	0	3	1	0	0	44	1	1	3	3	3	1	2	2	2	1	1	1	1	2	1	1	5	1	2	2	1	1	1	1	1	1	1	1	1	1	1	1	1	1
36	58	1	0	0	0	1	1	3	1	0	3	0	1	1	14	1	0	2	2	2	1	2	2	1	1	1	1	1	2	1	1	5	2	2	1	1	1	1	1	1	1	2	1	1	1	1	2	1	1
37	44	1	0	0	1	1	0	2	1	0	2	1	1	0	9	0	0	1	1	1	1	2	1	2	2	1	1	1	2	1	1	5	2	2	2	1	1	1	1	1	1	1	1	1	1	1	2	1	1
38	65	1	0	1	1	3	1	3	1	0	2	1	0	0	14	1	0	2	2	1	1	2	2	2	1	1	1	2	1	1	2	5	1	1	1	1	1	2	1	1	1	2	1	1	1	1	1	1	1
39	58	1	0	0	0	1	0	0	1	0	3	0	0	0	7	1	0	3	3	3	1	2	2	2	2	2	2	2	2	2	2	4	1	1	1	2	1	1	1	1	1	2	1	1	1	1	3	1	1
40	52	1	0	0	1	1	0	1	1	0	0	0	0	0	24	0	0	1	1	1	1	1	1	1	1	1	1	1	1	1	1	6	1	1	1	1	1	1	1	1	1	1	1	1	1	1	1	1	1
41	46	0	0	1	1	1	0	4	6	0	4	0	1	1	69	1	0
42	51	1	0	0	1	1	0	0	1	0	4	0	0	0	6	1	0	4	4	4	1	3	2	2	2	1	1	2	3	1	1	4	3	3	3	1	1	2	1	1	2	2	1	1	1	1	2	1	1
43	59	0	1	0	1	1	2	0	0	0	3	0	0	0	65	0	0
44	61	1	0	1	1	1	0	2	7	0	2	0	0	0	8	1	0	4	4	4	1	3	2	2	2	1	1	2	3	1	1	3	3	4	4	2	2	1	2	2	2	1	1	1	1	1	2	1	1
45	67	0	0	0	1	1	0	4	9	0	3	0	1	1	21	1	0	3	3	4	1	3	3	2	2	1	1	2	3	2	1	4	1	3	3	1	1	1	2	2	1	1	1	1	1	1	1	1	2
46	49	1	0	0	1	1	0	4	1	0	3	0	1	1	21	1	0
47	45	1	0	0	1	1	0	0	1	0	4	1	1	1	30	1	0	4	4	4	3	3	3	4	4	3	2	4	4	3	4	1	4	4	4	3	2	2	2	3	4	3	4	4	4	4	4	2	2
48	37	1	0	0	1	1	0	1	1	0	4	1	1	1	171	0	0	2	2	2	1	2	1	2	1	1	1	2	2	1	1	6	2	3	2	1	1	1	1	1	1	3	1	1	1	1	2	1	1
49	47	1	0	0	1	0	0	0	1	0	0	0	1	1	7	1	0	1	1	1	1	1	1	1	1	1	1	1	1	1	1	1	1	2	2	2	2	3	3	2	1	2	1	1	1	2	1	2	1
50	55	1	0	0	0	3	0	0	1	0	4	1	0	0	9	1	0
51	51	1	0	0	1	1	0	0	1	0	0	1	0	0	21	1	0	1	1	1	1	2	1	1	1	1	1	1	1	1	1	6	1	1	1	1	1	2	2	2	1	1	1	1	1	1	1	1	1
52	34	1	0	0	1	0	0	0	7	0	4	0	1	1	37	0	0	1	2	2	1	1	1	1	2	1	1	1	2	1	1	4	1	3	2	1	1	1	1	1	1	2	2	1	1	1	2	1	1
Raw Score																		2.13043	2.15217	2.1087	1.15217	1.86957	1.84783	1.76087	1.52174	1.23913	1.23913	1.73913	1.86957	1.84783	1.3913	4.43478	1.47826	1.82609	1.6087	1.36957	1.23913	1.47826	1.5	1.5	1.30435	1.71739	1.26087	1.26087	1.26087	1.36957	1.67391	1.15217	1.1087
Linear Fn Scale																		62.3188	61.5942	63.0435	94.9275	71.0145	71.7391	74.6377	82.6087	92.029	92.029	75.3623	71.0145	71.7391	86.9565	42.7536	84.058	72.4638	79.7101	87.6812	92.029	84.058	83.3333	83.3333	89.8551	76.087	91.3043	91.3043	91.3043	87.6812	77.5362	94.9275	96.3768
Linear Symp Scale																		37.6812	38.4058	36.9565	5.07246	28.9855	28.2609	25.3623	17.3913	7.97101	7.97101	24.6377	28.9855	28.2609	13.0435	57.2464	15.942	27.5362	20.2899	12.3188	7.97101	15.942	16.6667	16.6667	10.1449	23.913	8.69565	8.69565	8.69565	12.3188	22.4638	5.07246	3.62319
Linear QoL																		37.6812	38.4058	36.9565	5.07246	28.9855	28.2609	25.3623	17.3913	7.97101	7.97101	24.6377	28.9855	28.2609	13.0435	57.2464	15.942	27.5362	20.2899	12.3188	7.97101	15.942	16.6667	16.6667	10.1449	23.913	8.69565	8.69565	8.69565	12.3188	22.4638	5.07246	3.62319
[truncated: 3 more columns]

## Sheet: R3_90DAYS
PID	AGE	SEX	POR	REL	EDU	MS	ES	OCC	PT	SIRR	ECPS	PRIOR	RDG	RDF	TSD	COM	MEDS	PAL1	PAL2	PAL3	PAL4	PAL5	PAL6	PAL7	PAL8	PAL9	PAL10	PAL11	PAL12	PAL13	PAL14	PAL15	BN31	BN32	BN33	BN34	BN35	BN36	BN37	BN38	BN39	BN40	BN41	BN42	BN43	BN44	BN45	BN46	BN47
1	59	1	0	0	1	1	0	0	1	0	3	0	1	1	7	0	0
2	39	1	0	0	1	1	0	1	1	0	2	0	1	1	14	0	1
3	59	1	0	0	0	1	0	0	5	0	2	0	1	1	30	0	0	2	2	1	1	2	2	2	1	1	1	2	2	1	1	3	1	2	2	2	1	2	2	2	1	2	1	1	1	1	1	1	1
4	71	1	0	0	0	3	3	1	1	0	4	0	0	0	60	1	0	2	2	2	1	2	2	2	2	1	1	2	2	2	2	5	1	1	1	2	2	1	1	1	2	2	2	2	1	2	2	1	1
5	47	0	1	0	1	0	0	2	7	0	1	1	0	0	21	1	0	2	2	2	1	2	1	2	1	1	1	2	1	2	1	5	2	2	1	1	1	1	1	1	1	2	1	2	2	2	2	1	1
6	50	1	0	0	1	1	0	0	1	0	1	1	0	0	30	0	2	1	1	1	2	2	1	2	1	1	1	1	1	1	1	5	1	1	1	2	1	1	1	1	1	2	1	1	1	1	1	1	1
7	54	1	0	0	1	1	1	3	1	0	3	1	0	0	7	0	0	2	3	3	1	2	2	2	2	1	1	2	2	2	2	4	1	1	1	2	1	2	2	2	1	2	1	1	1	1	2	1	1
8	75	1	0	0	1	1	1	3	7	0	4	0	1	1	5	1	0
9	46	1	0	0	1	1	0	1	1	0	3	0	1	1	3	0	0	1	1	2	1	1	2	2	1	1	1	1	1	1	1	6	1	1	1	1	1	1	1	1	1	1	1	1	1	1	1	1	1
10	57	1	0	0	1	1	1	3	3	0	4	0	0	0	30	0	0	1	2	1	1	1	2	1	1	1	1	2	1	1	1	4	1	1	1	1	1	2	2	2	2	2	1	1	1	1	1	1	1
11	60	1	0	0	1	1	1	3	1	0	2	0	0	0	14	1	0	1	1	1	1	1	1	1	1	1	1	1	1	1	1	5	1	1	1	2	1	2	2	2	1	2	1	1	1	1	1	1	1
12	38	1	0	0	1	1	0	0	1	0	4	1	0	0	6	0	0
13	67	0	0	0	1	1	0	4	10	0	2	0	0	0	30	1	0	1	1	1	1	1	1	2	1	1	1	1	2	1	1	6	1	1	1	1	1	1	1	1	1	2	1	1	1	1	1	1	1
14	70	1	0	0	1	1	0	0	4	0	3	0	0	0	14	1	0
15	59	0	1	0	1	1	0	1	2	0	1	1	0	0	600	1	0	1	1	1	2	3	2	3	3	1	1	2	2	1	1	5	1	1	1	1	1	1	1	1	1	1	2	1	2	1	1	1	1
16	64	1	0	0	1	3	0	0	1	0	1	1	1	1	7	1	0	1	1	1	1	1	1	1	1	1	1	1	1	1	1	6	1	1	1	1	1	1	1	1	1	1	1	1	1	1	1	1	1
17	40	1	0	0	0	1	0	0	1	0	1	1	1	1	49	0	0
18	56	1	0	1	1	1	0	4	1	0	2	0	0	0	10	0	0	3	3	3	2	2	2	2	2	2	1	2	2	1	1	3	1	1	1	1	1	1	1	1	1	2	2	2	1	2	1	1	1
19	52	1	0	0	1	1	1	3	1	0	2	0	0	0	14	1	0	2	2	1	1	1	1	3	1	1	1	3	1	1	1	6	1	1	1	1	1	2	1	2	1	1	1	1	1	2	1	1	1
20	49	1	1	0	1	1	0	0	7	0	3	0	0	0	35	1	0
21	23	0	0	0	1	0	1	4	5	0	1	1	1	1	60	0	0	1	1	1	1	1	1	1	1	1	1	1		1	1	6	2	1	1	1	2	1	1	1	1	1	1	1	1	1	1	1	1
22	48	1	0	0	0	1	2	0	1	0	2	0	0	0	7	1	0
23	61	0	0	2	1	1	1	3	7	0	2	0	1	1	25	0	0	2	2	2	1	1	1	2	2	1	3	3	3	2	2	4	1	2	1	1	2	2	2	1	1	1	2	3	3	3	1	2	2
24	74	1	1	0	0	1	1	3	7	0	0	0	0	0	14	1	0
25	28	1	0	0	1	1	1	3	1	0	3	1	1	1	1	0	0	4	3	3	1	3	3	3	3	2	3	3	3	2	2	4	4	4	4	1	3	3	2	2	1	1	1	1	1	1	2	1	1
26	81	0	0	0	1	1	1	3	5	0	0	0	1	1	27	1	0	1	2	1	1	1	2	2	2	1	1	2	1	1	1	5	1	1	2	1	2	1	2	2	1	1	1	1	1	1	2	1	1
27	54	1	0	0	1	1	2	0	1	0	4	1	1	1	2	1	0
28	30	1	0	0	1	1	2	0	1	0	3	0	0	0	81	0	0
29	47	1	0	0	0	1	0	0	1	0	2	0	1	1	5	1	0	1	1	1	1	1	1	2	1	1	1	2	1	1	1	6	1	3	2	1	1	1	1	1	1	1	1	1	1	1	2	1	1
30	38	1	0	0	1	1	1	3	1	0	2	1	1	1	22	1	2
31	50	1	0	0	1	1	2	0	1	0	2	0	1	1	21	1	0
32	57	1	0	0	1	2	0	2	1	0	0	1	1	1	7	0	0	3	3	3	1	2	1	1	2	1	1	2	2	1	1	5	2	2	1	1	1	1	1	1	1	2	1	1	1	1	1	2	1
33	63	1	0	0	1	1	0	0	1	0	0	0	1	1	14	1	0	1	1	1	1	2	1	2	1	1	1	2	2	1	1	5	2	2	3	1	1	1	1	1	1	2	1	1	1	1	2	1	1
34	33	1	0	0	1	0	1	4	8	0	1	0	1	1	30	0	0	2	2	2	1	2	2	1	2	1	1	2	2	1	1	5	2	3	3	1	2	1	1	2	1	2	1	1	1	1	2	1	1
35	58	1	0	0	1	1	1	3	1	0	3	1	0	0	44	1	1
36	58	1	0	0	0	1	1	3	1	0	3	0	1	1	14	1	0	3	3	3	1	3	2	3	2	2	1	3	3	1	1	3	3	3	3	1	2	1	1	1	1	1	1	1	2	1	2	1	1
37	44	1	0	0	1	1	0	2	1	0	2	1	1	0	9	0	0
38	65	1	0	1	1	3	1	3	1	0	2	1	0	0	14	1	0	2	2	1	1	2	2	2	1	1	1	2	2	2	1	6	1	1	1	1	1	1	2	1	1	1	1	1	1	1	1	1	1
39	58	1	0	0	0	1	0	0	1	0	3	0	0	0	7	1	0
40	52	1	0	0	1	1	0	1	1	0	0	0	0	0	24	0	0	1	1	1	1	1	1	1	1	1	1	1	2	1	1	6	1	1	1	1	1	1	1	1	1	1	1	1	1	1	1	1	1
41	46	0	0	1	1	1	0	4	6	0	4	0	1	1	69	1	0
42	51	1	0	0	1	1	0	0	1	0	4	0	0	0	6	1	0
43	59	0	1	0	1	1	2	0	0	0	3	0	0	0	65	0	0
44	61	1	0	1	1	1	0	2	7	0	2	0	0	0	8	1	0	4	4	4	2	3	3	2	2	1	1	3	4	2	2	3	3	3	3	1	1	1	1	1	1	2	1	1	1	1	2	1	1
45	67	0	0	0	1	1	0	4	9	0	3	0	1	1	21	1	0
46	49	1	0	0	1	1	0	4	1	0	3	0	1	1	21	1	0
47	45	1	0	0	1	1	0	0	1	0	4	1	1	1	30	1	0
48	37	1	0	0	1	1	0	1	1	0	4	1	1	1	171	0	0	2	2	2	1	1	2	2	2	1	1	1	2	1	1	5	2	3	3	1	1	1	1	1	1	2	1	1	1	1	2	1	1
49	47	1	0	0	1	0	0	0	1	0	0	0	1	1	7	1	0	1	1	1	1	2	2	2	1	1	1	2	2	1	1	5	2	2	1	1	1	2	2	1	1	1	1	1	1	1	1	1	1
50	55	1	0	0	0	3	0	0	1	0	4	1	0	0	9	1	0
51	51	1	0	0	1	1	0	0	1	0	0	1	0	0	21	1	0
52	34	1	0	0	1	0	0	0	7	0	4	0	1	1	37	0	0	2	2	2	2	3	2	2	2	1	1	2	3	1	1	4	2	3	2	1	1	1	1	1	1	3	1	1	1	2	2	1	1
Raw Score																		1.78571	1.85714	1.71429	1.17857	1.75	1.64286	1.89286	1.53571	1.10714	1.14286	1.89286	1.82143	1.25	1.17857	4.82143	1.53571	1.75	1.60714	1.17857	1.28571	1.32143	1.32143	1.28571	1.07143	1.57143	1.14286	1.17857	1.17857	1.25	1.42857	1.07143	1.03571
Linear Fn Scale																		73.8095	71.4286	76.1905	94.0476	75	78.5714	70.2381	82.1429	96.4286	95.2381	70.2381	72.619	91.6667	94.0476	36.3095	82.1429	75	79.7619	94.0476	90.4762	89.2857	89.2857	90.4762	97.619	80.9524	95.2381	94.0476	94.0476	91.6667	85.7143	97.619	98.8095
Linear Symp Scale																		26.1905	28.5714	23.8095	5.95238	25	21.4286	29.7619	17.8571	3.57143	4.7619	29.7619	27.381	8.33333	5.95238	63.6905	17.8571	25	20.2381	5.95238	9.52381	10.7143	10.7143	9.52381	2.38095	19.0476	4.7619	5.95238	5.95238	8.33333	14.2857	2.38095	1.19048
Linear QoL																		26.1905	28.5714	23.8095	5.95238	25	21.4286	29.7619	17.8571	3.57143	4.7619	29.7619	27.381	8.33333	5.95238	63.6905	17.8571	25	20.2381	5.95238	9.52381	10.7143	10.7143	9.52381	2.38095	19.0476	4.7619	5.95238	5.95238	8.33333	14.2857	2.38095	1.19048
[truncated: 3 more columns]

## Sheet: R4_180DAYS
PID	AGE	SEX	POR	REL	EDU	MS	ES	OCC	PT	SIRR	ECPS	PRIOR	RDG	RDF	TSD	COM	MEDS	PAL1	PAL2	PAL3	PAL4	PAL5	PAL6	PAL7	PAL8	PAL9	PAL10	PAL11	PAL12	PAL13	PAL14	PAL15	BN31	BN32	BN33	BN34	BN35	BN36	BN37	BN38	BN39	BN40	BN41	BN42	BN43	BN44	BN45	BN46	BN47
1	59	1	0	0	1	1	0	0	1	0	3	0	1	1	7	0	0
2	39	1	0	0	1	1	0	1	1	0	2	0	1	1	14	0	1
3	59	1	0	0	0	1	0	0	5	0	2	0	1	1	30	0	0	2	2	1	1	1	2	2	2	2	1	2	2	1	1	4	1	2	2	2	2	1	1	2	1	2	1	1	1	1	1	1	1
4	71	1	0	0	0	3	3	1	1	0	4	0	0	0	60	1	0	3	3	3	1	2	2	2	3	2	1	2	2	1	1	4	2	2	1	2	1	1	1	1	1	2	1	1	1	2	1	1	1
5	47	0	1	0	1	0	0	2	7	0	1	1	0	0	21	1	0	1	2	1	1	1	2	2	1	2	1	1	1	2	1	4	2	2	2	1	1	2	1	2	2	2	2	1	1	1	1	1	1
6	50	1	0	0	1	1	0	0	1	0	1	1	0	0	30	0	2
7	54	1	0	0	1	1	1	3	1	0	3	1	0	0	7	0	0	2	3	3	1	2	2	2	2	1	1	2	2	1	1	4	1	1	1	2	1	2	2	2	1	2	1	1	1	1	2	1	1
8	75	1	0	0	1	1	1	3	7	0	4	0	1	1	5	1	0
9	46	1	0	0	1	1	0	1	1	0	3	0	1	1	3	0	0	1	1	1	1	2	2	1	1	1	1	1	2	1	1	5	1	1	1	3	1	1	1	1	1	1	1	1	1	1	1	1	1
10	57	1	0	0	1	1	1	3	3	0	4	0	0	0	30	0	0	1	1	2	1	1	2	2	2	1	1	1	2	1	1	4	1	1	1	1	1	2	3	2	2	2	1	1	1	1	1	1	1
11	60	1	0	0	1	1	1	3	1	0	2	0	0	0	14	1	0
12	38	1	0	0	1	1	0	0	1	0	4	1	0	0	6	0	0
13	67	0	0	0	1	1	0	4	10	0	2	0	0	0	30	1	0
14	70	1	0	0	1	1	0	0	4	0	3	0	0	0	14	1	0
15	59	0	1	0	1	1	0	1	2	0	1	1	0	0	600	1	0	1	1	1	1	2	2	1	1	1	1	2	2	1	1	5	1	1	1	1	1	1	1	1	1	1	2	1	2	1	2	1	1
16	64	1	0	0	1	3	0	0	1	0	1	1	1	1	7	1	0	1	2	1	1	1	2	1	1	1	1	2	2	2	1	5	2	2	1	2	2	3	3	1	1	2	2	1	1	1	1	1	2
17	40	1	0	0	0	1	0	0	1	0	1	1	1	1	49	0	0
18	56	1	0	1	1	1	0	4	1	0	2	0	0	0	10	0	0
19	52	1	0	0	1	1	1	3	1	0	2	0	0	0	14	1	0
20	49	1	1	0	1	1	0	0	7	0	3	0	0	0	35	1	0
21	23	0	0	0	1	0	1	4	5	0	1	1	1	1	60	0	0	1	1	1	1	1	1	1	1	1	1	1	1	1	1	6	2	1	1	1	1	1	1	1	1	1	1	1	1	1	1	1	1
22	48	1	0	0	0	1	2	0	1	0	2	0	0	0	7	1	0
23	61	0	0	2	1	1	1	3	7	0	2	0	1	1	25	0	0
24	74	1	1	0	0	1	1	3	7	0	0	0	0	0	14	1	0
25	28	1	0	0	1	1	1	3	1	0	3	1	1	1	1	0	0	3	3	3	3	3	3	3	2	2	2	2	3	2	2	3	3	3	3	1	2	2	2	2	1	1	1	1	1	1	1	1	1
26	81	0	0	0	1	1	1	3	5	0	0	0	1	1	27	1	0	2	2	2	1	2	2	2	2	1	1	2	2	1	1	5	1	1	2	1	2	1	2	2	1	1	1	1	1	1	2	1	1
27	54	1	0	0	1	1	2	0	1	0	4	1	1	1	2	1	0
28	30	1	0	0	1	1	2	0	1	0	3	0	0	0	81	0	0
29	47	1	0	0	0	1	0	0	1	0	2	0	1	1	5	1	0	1	1	2	1	2	2	2	2	2	1	1	2	1	1	5	2	3	3	2	1	1	1	2	1	1	1	1	1	1	2	1	1
30	38	1	0	0	1	1	1	3	1	0	2	1	1	1	22	1	2
31	50	1	0	0	1	1	2	0	1	0	2	0	1	1	21	1	0
32	57	1	0	0	1	2	0	2	1	0	0	1	1	1	7	0	0	3	2	2	1	3	2	2	2	1	1	2	3	1	1	4	2	4	4	1	2	1	1	1	1	3	1	1	1	1	2	1	1
33	63	1	0	0	1	1	0	0	1	0	0	0	1	1	14	1	0	1	1	1	1	2	2	2	2	1	1	1	2	2	1	5	2	2	2	1	1	1	1	1	1	1	1	1	1	1	1	1	1
34	33	1	0	0	1	0	1	4	8	0	1	0	1	1	30	0	0	3	2	2	1	2	2	2	1	1	1	2	2	1	1	5	2	3	2	1	1	1	1	1	1	2	1	1	1	1	2	1	1
35	58	1	0	0	1	1	1	3	1	0	3	1	0	0	44	1	1
36	58	1	0	0	0	1	1	3	1	0	3	0	1	1	14	1	0	2	2	2	2	2	3	3	3	1	1	2	3	1	1	4	2	2	2	1	2	1	2	2	1	2	1	1	1	1	1	1	1
37	44	1	0	0	1	1	0	2	1	0	2	1	1	0	9	0	0
38	65	1	0	1	1	3	1	3	1	0	2	1	0	0	14	1	0
39	58	1	0	0	0	1	0	0	1	0	3	0	0	0	7	1	0
40	52	1	0	0	1	1	0	1	1	0	0	0	0	0	24	0	0	1	1	1	1	2	1	2	1	1	1	2	1	1	1	6	1	1	1	1	1	1	1	1	1	1	1	1	1	1	1	1	1
41	46	0	0	1	1	1	0	4	6	0	4	0	1	1	69	1	0
42	51	1	0	0	1	1	0	0	1	0	4	0	0	0	6	1	0
43	59	0	1	0	1	1	2	0	0	0	3	0	0	0	65	0	0
44	61	1	0	1	1	1	0	2	7	0	2	0	0	0	8	1	0	4	4	4	2	3	3	2	2	2	1	2	2	2	1	3	3	2	2	1	1	1	1	1	1	3	1	1	1	2	2	1	1
45	67	0	0	0	1	1	0	4	9	0	3	0	1	1	21	1	0
46	49	1	0	0	1	1	0	4	1	0	3	0	1	1	21	1	0
47	45	1	0	0	1	1	0	0	1	0	4	1	1	1	30	1	0
48	37	1	0	0	1	1	0	1	1	0	4	1	1	1	171	0	0	2	1	2	1	2	2	2	2	1	1	2	2	1	1	5	2	2	2	1	1	1	1	1	1	2	1	1	1	1	2	1	1
49	47	1	0	0	1	0	0	0	1	0	0	0	1	1	7	1	0	1	1	1	1	1	2	1	1	1	1	2	1	1	1	5	1	2	2	1	2	1	1	1	1	1	1	1	1	2	1	1	1
50	55	1	0	0	0	3	0	0	1	0	4	1	0	0	9	1	0
51	51	1	0	0	1	1	0	0	1	0	0	1	0	0	21	1	0
52	34	1	0	0	1	0	0	0	7	0	4	0	1	1	37	0	0
Raw Score																		1.8	1.8	1.8	1.2	1.85	2.05	1.85	1.7	1.3	1.05	1.7	1.95	1.25	1.05	4.55	1.7	1.9	1.8	1.35	1.35	1.3	1.4	1.4	1.1	1.65	1.15	1	1.05	1.15	1.4	1	1.05
Linear Fn Scale																		73.3333	73.3333	73.3333	93.3333	71.6667	65	71.6667	76.6667	90	98.3333	76.6667	68.3333	91.6667	98.3333	40.8333	76.6667	70	73.3333	88.3333	88.3333	90	86.6667	86.6667	96.6667	78.3333	95	100	98.3333	95	86.6667	100	98.3333
Linear Symp Scale																		26.6667	26.6667	26.6667	6.66667	28.3333	35	28.3333	23.3333	10	1.66667	23.3333	31.6667	8.33333	1.66667	59.1667	23.3333	30	26.6667	11.6667	11.6667	10	13.3333	13.3333	3.33333	21.6667	5	0	1.66667	5	13.3333	0	1.66667
Linear QoL																		26.6667	26.6667	26.6667	6.66667	28.3333	35	28.3333	23.3333	10	1.66667	23.3333	31.6667	8.33333	1.66667	59.1667	23.3333	30	26.6667	11.6667	11.6667	10	13.3333	13.3333	3.33333	21.6667	5	0	1.66667	5	13.3333	0	1.66667
Age (Mean)	52.6154
Age (STD)	12.2759
Male		9
Female		43
Urban			47
Rural			5
Secondary					9
Post-secondary					43
Single						5
Married						42
Divorved						1
Widow						4
Employed							31
Unemployed							15
Self-employed							5
Retired							1
Anaplastic Thyroid									1
Breast									34
Carcinoid Tumor									1
Cup									1
GI									1
Head/Neck									3
LT Thigh									1
Lungs									7
Parotid									1
Prostate									1
Renal									1
KPS 90-100											7
KPS 70-80											7
KPS 50-60											14
KPS 30-40											13
KPS 10-20											11
KPS 0											0
Pior RT												19
No prior RH												33
Co-morb Abs																21
Co-morb Prsnt																31
Steroids																	48
Analgesic																	2
Analgesic/steroids																	2
[truncated: 3 more columns]

## Sheet: R0-R4 BN20 Scale 0-100
R0 - BASELINE		Future Uncertainty					Visual Disorders				Motor Dysnfuntion				Communication Deficit						Headache	Seizures	Drowsiness	Hair loss	Pruritus/Itchy skin	Weak legs	Bladder control
		BN31	BN32	BN33	BN35		BN36	BN37	BN38		BN40	BN45	BN49		BN41	BN42	BN43				BN34	BN39	BN44	BN46	BN47	BN48	BN50
	Linear Fn Scale	76.9	62.8	67.95	82.05	72.425	81.4	80.13	81.41	80.98	69.231	75.64	61.5	68.7903	80.128	85.26	85.256	83.548		Linear Symp Scale	48.1	12.82	18.59	3.205	4.487	28.21	26.28
						7.50554				0.601055				5.78103				2.41831
R1 - 7 Days		Future Uncertainty					Visual Disordders				Motor Dysnfuntion				Communication Deficit						Headache	Seizures	Drowsiness	Hair loss	Pruritus/Itchy skin	Weak legs	Bladder control
		BN31	BN32	BN33	BN35		BN36	BN37	BN38		BN40	BN45	BN49		BN41	BN42	BN43				BN34	BN39	BN44	BN46	BN47	BN48	BN50
	Linear Fn Scale	81.633	69.39	73.5	87.8	78.0807	80.95	83.673	87.07	83.8977	74.15	76.87	65.986	72.3353	89.12	91.156	90.476	90.2507		Linear Symp Scale	21.77	7.483	14.29	5.44218	4.081	27.891	19.728
						7.13433				2.50353				4.62494				0.846327
R2 - 30 Days		Future Uncertainty					Visual Disordders				Motor Dysnfuntion				Communication Deficit						Headache	Seizures	Drowsiness	Hair loss	Pruritus/Itchy skin	Weak legs	Bladder control
		BN31	BN32	BN33	BN35		BN36	BN37	BN38		BN40	BN45	BN49		BN41	BN42	BN43				BN34	BN39	BN44	BN46	BN47	BN48	BN50
	Linear Fn Scale	81.4	72.468	79.71	92.029	81.4017	84.058	83.33	83.3	83.5627	84.058	77.536	68.84	76.8113	91.3	91.3	91.304	91.3013		Linear Symp Scale	12.32	10.14	12.319	5.0725	3.62	24.368	14.5
						6.99307				0.350468				6.23382				0.00188562
R3 - 90 Days		Future Uncertainty					Visual Disordders				Motor Dysnfuntion				Communication Deficit						Headache	Seizures	Drowsiness	Hair loss	Pruritus/Itchy skin	Weak legs	Bladder control
		BN31	BN32	BN33	BN35		BN36	BN37	BN38		BN40	BN45	BN49		BN41	BN42	BN43				BN34	BN39	BN44	BN46	BN47	BN48	BN50
	Linear Fn Scale	82.14	75	79.76	90.4762	81.844	89.2857	89.2857	90.4762	89.6825	80.9528	85.7143	80.9524	82.5398	95.2381	94.0762	94.0476	94.454		Linear Symp Scale	5.95238	2.38095	8.33333	2.38095	1.19048	10.7143	9.52381
						5.60771				0.561198				2.24468				0.554584
R4 - 180 Days		Future Uncertainty					Visual Disordders				Motor Dysnfuntion				Communication Deficit						Headache	Seizures	Drowsiness	Hair loss	Pruritus/Itchy skin	Weak legs	Bladder control
		BN31	BN32	BN33	BN35		BN36	BN37	BN38		BN40	BN45	BN49		BN41	BN42	BN43				BN34	BN39	BN44	BN46	BN47	BN48	BN50
	Linear Fn Scale	76.7	70	73.33	88.3	77.0825	90	86.667	86.667	87.778	78.333	86.67	80	81.6677	95	100	98.333	97.7777		Linear Symp Scale	11.67	3.33	5	0	1.6667	8.333	8.333
						6.89604				1.57119				3.60206				2.07867
		Higher scores indicate better function																			Higher scores indicate severe symptoms
*Keys	Mean
	STD
			Future uncertainty	Visual disorders	Motor dysfunction	Communication deficit																Headache	Seizures	Drowsiness	Hair loss	Itchy skin	Weak legs	Bladder control
		Baseline	72.43	80.98	68.79	83.55															Baseline	48.1	12.82	18.59	3.21	4.49	28.21	26.28
		Day 7	78.08	83.9	72.34	90.25															Day 7	21.77	7.48	14.29	5.44	4.08	27.89	19.73
		Day 30	81.4	83.56	76.81	91.3															Day 30	12.32	10.14	12.32	5.07	3.62	24.37	14.5
		Day 90	81.84	89.68	82.54	94.45															Day 90	5.95	2.38	8.33	2.38	1.19	10.71	9.52
		Day 180	77.08	87.78	81.67	97.78															Day 180	10	1.67	3.33	1.67	0	6.67	6.67
			7.51	0.6	5.78	2.42
			7.13	2.5	4.62	0.85
		STD	6.99	0.35	6.23	0
			5.61	0.56	2.24	0.55
			6.92	0.79	2.83	2.08

## Sheet: R0-R4 PAL Scale 0-100
R0 - BASELINE		Physical functioning				Emotional functioning					Fatigue			Pain			Dyspnea	Insomnia	Appetite loss	Nausea/vomit	Constipation			Global Health Status
		PAL1	PAL2	PAL3		PAL13	PAL14				PAL7	PAL11		PAL5	PAL12		PAL4	PAL6	PAL8	PAL9	PAL10			PAL15
	Linear Fn Scale	49.4	49.4	51.92	50.24	76.923	81.41	79.1665		Linear Symp Scale	39.1	35.9	37.5	41.7	39.74	40.72	10.9	36.5	28.2	12.8	18.59		Linear QoL	48.72
					1.18794			2.2435					1.6			0.98
R1 - 7 Days		Physical functioning				Emotional functioning					Fatigue			Pain			Dyspnea	Insomnia	Appetite loss	Nausea/vomit	Constipation			Global Health Status
		PAL1	PAL2	PAL3		PAL13	PAL14				PAL7	PAL11		PAL5	PAL12		PAL4	PAL6	PAL8	PAL9	PAL10			PAL15
	Linear Fn Scale	58.5	59.2	58.5	58.7333	82.3129	87.76	85.0365		Linear Symp Scale	31.97	30.61	31.29	36.05	31.973	34.0115	5.442	28.57	17.007	8.8435	18.367		Linear QoL	56.12
					0.329983			2.72355					0.68			2.0385
R2 - 30 Days		Physical functioning				Emotional functioning					Fatigue			Pain			Dyspnea	Insomnia	Appetite loss	Nausea/vomit	Constipation			Global Health Status
		PAL1	PAL2	PAL3		PAL13	PAL14				PAL7	PAL11		PAL5	PAL12		PAL4	PAL6	PAL8	PAL9	PAL10			PAL15
	Linear Fn Scale	62.3	61.6	63	62.3	71.739	86.957	79.348		Linear Symp Scale	25.4	24.368	24.884	28.99	28.9855	28.9877	5.0725	28.261	17.391	7.97	7.971		Linear QoL	57.246
					0.571548			7.609					0.516			0.00225
R3 - 90 Days		Physical functioning				Emotional functioning					Fatigue			Pain			Dyspnea	Insomnia	Appetite loss	Nausea/vomit	Constipation			Global Health Status
		PAL1	PAL2	PAL3		PAL13	PAL14				PAL7	PAL11		PAL5	PAL12		PAL4	PAL6	PAL8	PAL9	PAL10			PAL15
	Linear Fn Scale	73.8	71.43	76.2	73.81	91.667	94	92.8335		Linear Symp Scale	29.76	29.7619	29.761	25	27.38	26.19	5.952	25	17.86	3.571	4.7619		Linear QoL	63.69
					1.94736			1.1665					0.00095			1.19
R4 - 180 Days		Physical functioning				Emotional functioning					Fatigue			Pain			Dyspnea	Insomnia	Appetite loss	Nausea/vomit	Constipation			Global Health Status
		PAL1	PAL2	PAL3		PAL13	PAL14				PAL7	PAL11		PAL5	PAL12		PAL4	PAL6	PAL8	PAL9	PAL10			PAL15
	Linear Fn Scale	73.33	73.33	73.33	73.33	91.667	98.333	95		Linear Symp Scale	28.333	23.33	25.8315	28.33	31.67	30	6.667	35	23.333	10	1.667		Linear QoL	59.166
					0			3.333					2.5015			1.67
		Higher scores indicate better function									Higher scores indicate severe symptoms
*Keys	Mean
	STD
			Physical functioning	Emotional functioning								Fatigue	Pain	Dyspnea	Insomnia	Appetite loss	Nausea	Constipation
		Baseline	50.24	79.17							Baseline	37.5	40.72	10.9	36.5	28.2	12.8	18.59						0	48.72
		Day 7	58.73	85.04							Day 7	31.29	34.01	5.44	28.57	17.01	8.84	18.37						7	56.12
		Day 30	62.3	79.35							Day 30	24.88	28.99	5.07	28.26	17.39	7.97	7.97						30	57.25
		Day 90	78.31	92.83							Day 90	29.76	26.19	5.95	25	17.86	3.57	4.76						90	63.69
		Day 180	73.33	95							Day 180	25.5	30	6.66	35	23.33	10	1.67						180	59.17
			1.19	2.24
			0.33	2.72
			0.57	7.61
			1.95	1.17
			0.01	3.33
